# Supplementary material for: Single-Species Artificial Grasslands Decrease Soil Multifunctionality in a Temperate Steppe on the Qinghai–Tibet Plateau
Source: MDPI journal article supplement (doi:10.3390/agronomy11112092), 2021-10-20

Tables S1 The results of the metagenomic workflow

|           | Sample ID                | Raw Reads | Clean Reads | Effective Reads | AvgLen(bp) | GC(%) | Q20(%) | Q30(%) | Effective (%) |
|-----------|--------------------------|-----------|-------------|-----------------|------------|-------|--------|--------|---------------|
| Fungi     | <i>E. nutans</i>         | 44563     | 38200       | 37456           | 244        | 50.4  | 99.7   | 99.29  | 84.05         |
|           |                          | 78066     | 67625       | 66296           | 249        | 48    | 99.6   | 99.12  | 84.92         |
|           |                          | 80147     | 70714       | 69250           | 243        | 46.12 | 99.7   | 99.34  | 86.4          |
|           | <i>E. breviaris</i>      | 79982     | 69959       | 68421           | 237        | 49.01 | 99.76  | 99.44  | 85.55         |
|           |                          | 80220     | 69799       | 68180           | 245        | 43.26 | 99.66  | 99.26  | 84.99         |
|           |                          | 79833     | 71512       | 70068           | 239        | 45.75 | 99.73  | 99.39  | 87.77         |
|           | <i>R. pauciflora</i>     | 79791     | 70615       | 69046           | 242        | 43.28 | 99.72  | 99.36  | 86.53         |
|           |                          | 80026     | 70364       | 68782           | 239        | 46.09 | 99.74  | 99.39  | 85.95         |
|           |                          | 80139     | 71201       | 69720           | 234        | 46.49 | 99.79  | 99.5   | 87            |
|           | <i>P. crymophila</i>     | 79967     | 71976       | 70603           | 232        | 46.09 | 99.8   | 99.53  | 88.29         |
|           |                          | 80042     | 70945       | 68871           | 240        | 45.5  | 99.74  | 99.41  | 86.04         |
|           |                          | 80123     | 69551       | 68058           | 235        | 49.52 | 99.79  | 99.49  | 84.94         |
|           | <i>E. sibircus</i>       | 80037     | 69730       | 68191           | 240        | 45.37 | 99.73  | 99.38  | 85.2          |
|           |                          | 80109     | 71773       | 70444           | 237        | 46.37 | 99.78  | 99.48  | 87.94         |
|           |                          | 79824     | 70226       | 68709           | 240        | 46.43 | 99.75  | 99.42  | 86.08         |
|           | <i>E. sinosubmuticus</i> | 79942     | 70774       | 69250           | 237        | 45.3  | 99.74  | 99.41  | 86.63         |
|           |                          | 80308     | 71227       | 69423           | 246        | 43.64 | 99.68  | 99.3   | 86.45         |
|           |                          | 80024     | 69674       | 68113           | 232        | 46.45 | 99.78  | 99.48  | 85.12         |
|           | <i>P. tenuiflora</i>     | 80076     | 70336       | 68913           | 239        | 48.8  | 99.76  | 99.43  | 86.06         |
|           |                          | 80082     | 68427       | 66032           | 242        | 47.73 | 99.71  | 99.32  | 82.46         |
|           |                          | 79737     | 70675       | 68245           | 238        | 46.03 | 99.76  | 99.45  | 85.59         |
|           | CK                       | 80227     | 71579       | 70022           | 240        | 44.64 | 99.72  | 99.36  | 87.28         |
|           |                          | 79627     | 68396       | 66878           | 260        | 48.11 | 99.47  | 98.84  | 83.99         |
|           |                          | 79814     | 69762       | 68067           | 245        | 46.06 | 99.66  | 99.25  | 85.28         |
|           |                          | 79944     | 69684       | 68192           | 251        | 45.16 | 99.59  | 99.11  | 85.3          |
|           |                          | 79752     | 70843       | 69451           | 257        | 45.8  | 99.59  | 99.11  | 87.08         |
|           |                          | 69989     | 58471       | 53715           | 419        | 56.15 | 98.14  | 96.46  | 76.75         |
| Bacterial | <i>E. nutans</i>         | 69963     | 58780       | 53271           | 418        | 56.23 | 98.21  | 96.56  | 76.14         |
|           |                          | 69937     | 60022       | 54778           | 418        | 56.12 | 98.31  | 96.73  | 78.32         |
|           |                          | 70006     | 58772       | 55696           | 418        | 56.21 | 98.22  | 96.6   | 79.56         |
|           | <i>E. breviaris</i>      | 70045     | 55848       | 49960           | 418        | 56.17 | 97.89  | 96.01  | 71.33         |
|           |                          | 69910     | 58621       | 54194           | 419        | 56.05 | 98.13  | 96.45  | 77.52         |
|           |                          | 69965     | 58367       | 52877           | 418        | 56.38 | 98.19  | 96.52  | 75.58         |
|           | <i>R. pauciflora</i>     | 70112     | 59866       | 55341           | 419        | 56.39 | 98.31  | 96.74  | 78.93         |
|           |                          | 68796     | 58675       | 55084           | 418        | 56.57 | 98.35  | 96.81  | 80.07         |
|           |                          | 69931     | 59946       | 56899           | 418        | 56.25 | 98.28  | 96.69  | 81.36         |
|           | <i>P. crymophila</i>     | 70053     | 59862       | 54369           | 418        | 56.19 | 98.25  | 96.64  | 77.61         |
|           |                          | 70048     | 56874       | 50700           | 418        | 56.17 | 98.05  | 96.29  | 72.38         |
|           |                          | 69775     | 58008       | 52800           | 418        | 56.22 | 98.08  | 96.34  | 75.67         |
|           | <i>E. sibircus</i>       | 69929     | 60509       | 55733           | 418        | 56.39 | 98.26  | 96.65  | 79.7          |
|           |                          | 70559     | 61125       | 55426           | 418        | 56.09 | 98.32  | 96.76  | 78.55         |

|                  |       |       |       |     |       |       |       |       |
|------------------|-------|-------|-------|-----|-------|-------|-------|-------|
| <i>E.</i>        | 69972 | 58299 | 52991 | 418 | 56.34 | 98.18 | 96.51 | 75.73 |
| <i>sinosub</i>   | 70159 | 59278 | 53202 | 418 | 56.03 | 98.18 | 96.53 | 75.83 |
| <i>muticus</i>   | 69962 | 57996 | 51890 | 418 | 55.94 | 98.16 | 96.49 | 74.17 |
| <i>P.</i>        | 70204 | 60810 | 55644 | 418 | 56.07 | 98.35 | 96.81 | 79.26 |
| <i>tenuiflor</i> | 69910 | 59597 | 53805 | 418 | 55.87 | 98.29 | 96.71 | 76.96 |
| <i>a</i>         | 70148 | 60705 | 55548 | 418 | 56.12 | 98.34 | 96.79 | 79.19 |
|                  | 69978 | 59810 | 53600 | 419 | 56.46 | 98.28 | 96.69 | 76.6  |
|                  | 69881 | 58373 | 53664 | 420 | 57.13 | 98.23 | 96.57 | 76.79 |
| CK               | 70253 | 59567 | 54512 | 420 | 57.11 | 98.29 | 96.67 | 77.59 |
|                  | 69895 | 56898 | 51761 | 419 | 56.99 | 98.03 | 96.22 | 74.06 |
|                  | 64757 | 54639 | 50369 | 419 | 57.25 | 98.21 | 96.54 | 77.78 |

---

Tables S2 Soil moisture at artificial and natural grasslands. CK: Natural temperate steppe. The different lowercase letters above the bars denoted significant differences ( $P < 0.05$ ). Values represent means  $\pm$  SD

| grasslands types         | soil moisture (%)  |
|--------------------------|--------------------|
| <i>E. nutans</i>         | 22.12 $\pm$ 1.23a  |
| <i>E. breviaristatus</i> | 19.36 $\pm$ 1.86ab |
| <i>R. pauciflora</i>     | 15.27 $\pm$ 1.31c  |
| <i>P. crymophila</i>     | 19.96 $\pm$ 1.19ab |
| <i>E. sibircus</i>       | 18.97 $\pm$ 0.62b  |
| <i>E. sinosubmuticus</i> | 19.37 $\pm$ 2.09ab |
| <i>P. tenuiflora</i>     | 20.64 $\pm$ 1.13ab |
| CK                       | 24.04 $\pm$ 1.67ab |

Figures S1 Effects of artificial grasslands on shannon index of bacteria (Shannon\_B ) and fungi (Shannon\_F) and phylogenetic diversities of bacteria (PD\_whole\_tree\_B) and fungi(PD\_whole\_tree\_F). CK: Natural temperate steppe. E breviaristatus: *Elymus breviaristatus*. E nutans: *Elymus nutans*. E sibircus: *Elymus sibircus*. E sinosubmuticus: *Elymus sinosubmuticus*. P crymophila: *Poa crymophila*. P tenuiflora: *Puccinellia tenuiflora*. R pauciflora: *Roegneria pauciflora*. The different lowercase letters above the bars denoted significant differences ( $P < 0.05$ ).

Values are means  $\pm$  SD.

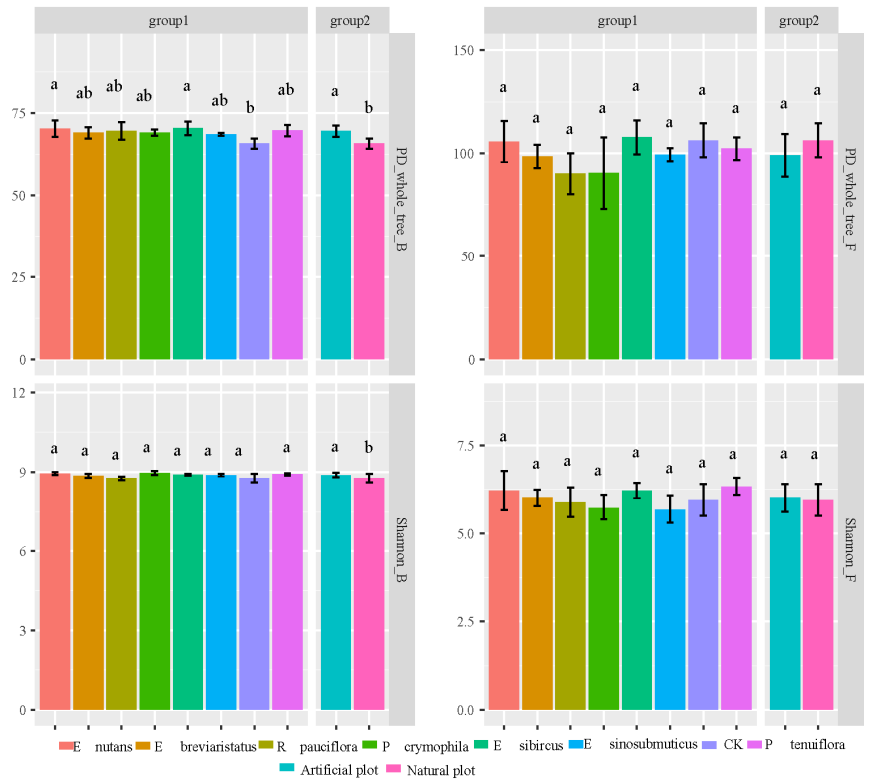

Supplement: s1 [file s1]
